# Supplementary material for: The heritable basis of gene–environment interactions in cardiometabolic traits
Source: Springer Nature journal article supplement (doi:10.1007/s00125-016-4184-0), 2016-12-21
Supplement: MOESM1 [file 11949564]

## ELECTRONIC SUPPLEMENTARY MATERIAL

### TABLE OF CONTENTS

|                                                                                                                        |             |
|------------------------------------------------------------------------------------------------------------------------|-------------|
| <b>ESM Table 1.</b> Number of relationships between pairs of phenotyped individuals                                    | Page 2      |
| <b>ESM Table 2.</b> Principal component analysis of macronutrient intake                                               | Page 3      |
| <b>ESM Table 3.</b> Variance components parameters estimates for genotype-age interactions                             | Page 4      |
| <b>ESM Table 4.</b> Variance components parameters estimates ( $\pm$ s.e.) for genotype-sex interactions               | Page 5      |
| <b>ESM Table 5.</b> Variance components parameters estimates ( $\pm$ s.e.) for genotype-physical activity interactions | Page 6      |
| <b>ESM Table 6.</b> Variance components parameters estimates ( $\pm$ s.e.) for genotype-smoking status interactions    | Page 7      |
| <b>ESM Table 7.</b> Variance components parameters estimates for genotype-alcohol intake interactions                  | Page 8      |
| <b>ESM Table 8.</b> Variance components parameters estimates for genotype-diet pattern interactions                    | Page 9      |
| <b>ESM Table 9.</b> Variance components parameters estimates for genotype-carbohydrate intake interactions             | Page 10     |
| <b>ESM Table 10.</b> Variance components parameters estimates for genotype-protein intake interactions                 | Page 11     |
| <b>ESM Table 11.</b> Variance components parameters estimates for genotype-fiber intake interactions                   | Page 12     |
| <b>ESM Table 12.</b> Variance components parameters estimates for genotype-total fat intake interactions               | Page 13     |
| <b>ESM Table 13.</b> Variance components parameters estimates for genotype-saturated fat intake interactions           | Page 14     |
| <b>ESM Table 14.</b> Variance components parameters estimates for genotype-essential fatty acids intake interactions   | Page 15     |
| <b>ESM Table 15.</b> Variance components parameters estimates for genotype-polyunsaturated fat intake interactions     | Page 16     |
| <b>ESM Table 16.</b> Variance components parameters estimates for genotype-monounsaturated fat intake interactions     | Page 17     |
| <b>ESM Table 17.</b> Sensitivity analyses for glycaemic and lipid traits excluding non-fasted individuals              | Pages 18-32 |
| <b>ESM Figure 1.</b> <i>Class 1</i> genotype-physical activity interactions                                            | Page 33     |
| <b>ESM Figure 2.</b> Genotype-diet components interactions                                                             | Pages 34-35 |
| <b>ESM Figure 3.</b> Genotype-fat interactions                                                                         | Pages 36-37 |

## ELECTRONIC SUPPLEMENTARY TABLES

**ESM Table 1.** Number of relationships between pairs of phenotyped individuals

| Kinship coefficient<br>( $\Phi$ ; range) | Relationship                                 | Number of pairs |
|------------------------------------------|----------------------------------------------|-----------------|
| 0.25<br>( $0.20 \leq \Phi < 0.30$ )      | First-degree relatives<br>(PO, FS)           | 8,908           |
| 0.125<br>( $0.10 \leq \Phi < 0.20$ )     | Second-degree relatives<br>(HS, AV, GG, D1C) | 5,794           |
| 0.0625<br>( $0.05 \leq \Phi < 0.10$ )    | Third-degree relatives<br>(1C, GAV, GGG)     | 29,706          |
| 0.03125<br>( $0.02 \leq \Phi < 0.05$ )   | Fourth-degree relatives<br>(1.5C, D2C)       | 45,939          |
| 0.01563<br>( $0.01 \leq \Phi < 0.02$ )   | Fifth-degree relative<br>(2C)                | 131,122         |
| 0.00781<br>( $0.005 \leq \Phi < 0.01$ )  | Sixth-degree relative<br>(2.5C)              | 335,519         |
| $0 \leq \Phi < 0.005$                    | Others                                       | 37,640,640      |

PO, parent–offspring; FS, full sibling; HS, half sibling; AV, avuncular; GG, grandparent–grandchild; D1C, double first cousins; 1C, first cousins; GAV, grand-avuncular; GGG, great grandparent-great grandchild; 1.5C, first cousin once removed; D2C, double second cousin; 2C, second cousin; 2.5C, second cousin once removed.

**ESM Table 2.** Principal component analysis of macronutrient intake

| Macronutrients intake     | Factor loading |
|---------------------------|----------------|
| Carbohydrate              | -0.92          |
| Protein                   | -0.10          |
| Total fat                 | 0.97           |
| Saturated fat             | 0.80           |
| MUFA                      | 0.93           |
| PUFA                      | 0.57           |
| Essential fatty acids     | 0.48           |
| Fibre                     | -0.66          |
| Eigenvalue                | 4.3            |
| Percent of total variance | 53.8%          |

MUFA, monounsaturated fatty acids; PUFA, polyunsaturated fatty acids. Essential fatty acids: omega-3 and omega-6 fatty acids.

**ESM Table 3.** Variance components parameters estimates for genotype-age interactions on 11 cardiometabolic traits

| Phenotypes              | $N$    | $\alpha_G$ | $\gamma_G$ | $\lambda$ | $\alpha_e$ | $\gamma_e$ | $\gamma_G$ $p$ -value                     | $\lambda$ $p$ -value                  |
|-------------------------|--------|------------|------------|-----------|------------|------------|-------------------------------------------|---------------------------------------|
| Weight, kg              | 16,296 | -0.7763    | -0.0055    | 0.0242    | -0.6414    | 0.0146     | 0.35                                      | <b><math>2 \times 10^{-6}</math>*</b> |
| BMI, kg/m <sup>2</sup>  | 16,281 | -0.8220    | 0.0012     | 0.0145    | -0.6011    | 0.0219     | 0.85                                      | <b><math>3 \times 10^{-3}</math></b>  |
| Waist circumference, cm | 1,905  | -0.7502    | -0.0198    | 0         | -0.6645    | 0.0221     | 0.59                                      | 0.50                                  |
| TC, mmol/l              | 14,366 | -0.8409    | 0.0036     | 0.0177    | -0.5873    | 0.0131     | 0.66                                      | <b><math>3 \times 10^{-3}</math></b>  |
| HDL-C, mmol/l           | 3,266  | -0.7780    | -0.0027    | 0.0252    | -0.6254    | 0.0094     | 0.79                                      | 0.06                                  |
| LDL-C, mmol/l           | 3,169  | -0.5760    | 0.0079     | 0.0393    | -0.8441    | 0.0144     | 0.39                                      | <b><math>1 \times 10^{-2}</math></b>  |
| TG, mmol/l              | 11,681 | -1.0485    | 0.0075     | 0         | -0.4405    | 0.0047     | 0.33                                      | 0.50                                  |
| Fasting glucose, mmol/l | 14,507 | -1.3952    | 0.0593     | 0         | -0.3294    | 0.0063     | <b><math>1 \times 10^{-2}</math></b>      | 0.50                                  |
| 2 h glucose, mmol/l     | 13,603 | -1.2873    | -0.0255    | 0.0207    | -0.3827    | 0.0404     | <b><math>3 \times 10^{-2}</math></b>      | <b><math>3 \times 10^{-2}</math></b>  |
| SBP, mmHg               | 16,097 | -1.0200    | 0.0518     | 0.0253    | -0.5231    | 0.0334     | <b><math>&lt;1 \times 10^{-9}</math>*</b> | <b><math>1 \times 10^{-3}</math></b>  |
| DBP, mmHg               | 16,092 | -1.0881    | 0.0189     | 0.0188    | -0.4225    | 0.0138     | <b><math>9 \times 10^{-3}</math></b>      | <b><math>1 \times 10^{-2}</math></b>  |

Significant estimates are marked in bold. \* Withstand the Bonferroni corrected  $p$ -value of 0.00019.

TC, total cholesterol; TG, triacylglycerol.

$\alpha_G$ ,  $\gamma_G$ ,  $\lambda$ ,  $\alpha_e$  and  $\gamma_e$  are parameters estimated in the genotype-environment interaction model for continuous environmental exposures (see Eq. 4 and 5).  $\gamma_G$   $p$ -value:  $p$ -value of the variance homogeneity null hypothesis;  $\lambda$   $p$ -value:  $p$ -value of the genetic correlation equal to 1 null hypothesis.

**ESM Table 4.** Variance components parameters estimates ( $\pm$ s.e.) for genotype-sex interactions on 11 cardiometabolic traits

| Phenotypes              | $N$    | $\sigma_G$ Females | $\sigma_G$ Males | $\sigma_E$ Females | $\sigma_E$ Males | $\sigma$ $p$ -value                         | $\rho_G$        | $\rho_G$ $p$ -value                          |
|-------------------------|--------|--------------------|------------------|--------------------|------------------|---------------------------------------------|-----------------|----------------------------------------------|
| Weight, kg              | 16,296 | 0.63 $\pm$ 0.03    | 0.60 $\pm$ 0.03  | 0.76 $\pm$ 0.02    | 0.80 $\pm$ 0.02  | 0.37                                        | 0.86 $\pm$ 0.08 | <b>5<math>\times</math>10<sup>-2</sup></b>   |
| BMI, kg/m <sup>2</sup>  | 16,281 | 0.72 $\pm$ 0.03    | 0.53 $\pm$ 0.03  | 0.81 $\pm$ 0.02    | 0.72 $\pm$ 0.02  | <b>4<math>\times</math>10<sup>-6</sup>*</b> | 0.89 $\pm$ 0.08 | 0.08                                         |
| Waist circumference, cm | 1,905  | 0.83 $\pm$ 0.20    | 0.60 $\pm$ 0.18  | 0.72 $\pm$ 0.23    | 0.68 $\pm$ 0.16  | 0.40                                        | 0.85 $\pm$ 0.50 | 0.39                                         |
| TC, mmol/l              | 14,366 | 0.66 $\pm$ 0.03    | 0.61 $\pm$ 0.03  | 0.74 $\pm$ 0.02    | 0.79 $\pm$ 0.02  | 0.24                                        | 0.79 $\pm$ 0.08 | <b>8<math>\times</math>10<sup>-3</sup></b>   |
| HDL-C, mmol/l           | 3,266  | 0.61 $\pm$ 0.11    | 0.67 $\pm$ 0.08  | 0.86 $\pm$ 0.08    | 0.66 $\pm$ 0.08  | 0.65                                        | 0.80 $\pm$ 0.26 | 0.22                                         |
| LDL-C, mmol/l           | 3,169  | 0.81 $\pm$ 0.08    | 0.48 $\pm$ 0.09  | 0.56 $\pm$ 0.10    | 0.89 $\pm$ 0.05  | <b>2<math>\times</math>10<sup>-2</sup></b>  | 1               | -                                            |
| TG, mmol/l              | 11,681 | 0.54 $\pm$ 0.03    | 0.82 $\pm$ 0.04  | 0.61 $\pm$ 0.02    | 0.83 $\pm$ 0.04  | <b>4<math>\times</math>10<sup>-7</sup>*</b> | 0.55 $\pm$ 0.07 | <b>2<math>\times</math>10<sup>-10</sup>*</b> |
| Fasting glucose, mmol/l | 14,507 | 0.53 $\pm$ 0.03    | 0.51 $\pm$ 0.04  | 0.81 $\pm$ 0.02    | 0.89 $\pm$ 0.02  | 0.67                                        | 0.73 $\pm$ 0.13 | <b>3<math>\times</math>10<sup>-2</sup></b>   |
| 2 h glucose, mmol/l     | 13,603 | 0.54 $\pm$ 0.04    | 0.53 $\pm$ 0.04  | 0.80 $\pm$ 0.03    | 0.89 $\pm$ 0.03  | 0.93                                        | 0.77 $\pm$ 0.14 | 0.06                                         |
| SBP, mmHg               | 16,097 | 0.67 $\pm$ 0.03    | 0.52 $\pm$ 0.03  | 0.77 $\pm$ 0.03    | 0.82 $\pm$ 0.02  | <b>2<math>\times</math>10<sup>-3</sup></b>  | 0.84 $\pm$ 0.08 | <b>3<math>\times</math>10<sup>-2</sup></b>   |
| DBP, mmHg               | 16,092 | 0.61 $\pm$ 0.03    | 0.51 $\pm$ 0.04  | 0.78 $\pm$ 0.02    | 0.87 $\pm$ 0.02  | <b>4<math>\times</math>10<sup>-2</sup></b>  | 0.92 $\pm$ 0.10 | 0.21                                         |

Significant estimates are marked in bold. \* Withstand the Bonferroni corrected  $P$ -value of 0.00019.

TC, total cholesterol; TG, triacylglycerol.

$\sigma_G$ : Genetic standard deviation;  $\sigma_E$ : Environmental standard deviation;  $\sigma$   $p$ -value:  $p$ -value of the variance homogeneity null hypothesis;  $\rho_G$ : genetic correlation;  $\rho_G$   $p$ -value:  $p$ -value of the genetic correlation equal to 1 null hypothesis.

**ESM Table 5.** Variance components parameters estimates ( $\pm$ s.e.) for genotype-physical activity interactions on 11 cardiometabolic traits

| Phenotypes              | $N$    | $\sigma_G$ Active | $\sigma_G$ Inactive | $\sigma_E$ Active | $\sigma_E$ Inactive | $\sigma$ $p$ -value                        | $\rho_G$        | $\rho_G$ $p$ -value                        |
|-------------------------|--------|-------------------|---------------------|-------------------|---------------------|--------------------------------------------|-----------------|--------------------------------------------|
| Weight, kg              | 14,350 | 0.60 $\pm$ 0.05   | 0.70 $\pm$ 0.02     | 0.71 $\pm$ 0.04   | 0.75 $\pm$ 0.02     | 0.06                                       | 0.99 $\pm$ 0.10 | 0.45                                       |
| BMI, kg/m <sup>2</sup>  | 14,341 | 0.61 $\pm$ 0.05   | 0.68 $\pm$ 0.03     | 0.69 $\pm$ 0.04   | 0.77 $\pm$ 0.02     | 0.17                                       | 0.92 $\pm$ 0.10 | 0.21                                       |
| Waist circumference, cm | 1,846  | 0.37 $\pm$ 0.20   | 0.79 $\pm$ 0.12     | 0.84 $\pm$ 0.09   | 0.66 $\pm$ 0.14     | 0.08                                       | 1               | -                                          |
| TC, mmol/l              | 12,828 | 0.71 $\pm$ 0.05   | 0.62 $\pm$ 0.03     | 0.70 $\pm$ 0.04   | 0.78 $\pm$ 0.02     | 0.14                                       | 1               | -                                          |
| HDL-C, mmol/l           | 2,296  | 0.55 $\pm$ 0.21   | 0.68 $\pm$ 0.13     | 0.82 $\pm$ 0.14   | 0.74 $\pm$ 0.11     | 0.63                                       | 1               | -                                          |
| LDL-C, mmol/l           | 2,271  | 0.78 $\pm$ 0.20   | 0.57 $\pm$ 0.12     | 0.59 $\pm$ 0.26   | 0.83 $\pm$ 0.09     | 0.44                                       | 1               | -                                          |
| TG, mmol/l              | 10,446 | 0.62 $\pm$ 0.06   | 0.63 $\pm$ 0.03     | 0.61 $\pm$ 0.05   | 0.83 $\pm$ 0.02     | 0.91                                       | 0.77 $\pm$ 0.11 | <b>3<math>\times</math>10<sup>-2</sup></b> |
| Fasting glucose, mmol/l | 12,831 | 0.50 $\pm$ 0.06   | 0.49 $\pm$ 0.03     | 0.86 $\pm$ 0.03   | 0.87 $\pm$ 0.02     | 0.97                                       | 1               | -                                          |
| 2 h glucose, mmol/l     | 12,133 | 0.38 $\pm$ 0.06   | 0.54 $\pm$ 0.04     | 0.87 $\pm$ 0.03   | 0.86 $\pm$ 0.02     | <b>4<math>\times</math>10<sup>-2</sup></b> | 1               | -                                          |
| SBP, mmHg               | 14,153 | 0.51 $\pm$ 0.06   | 0.63 $\pm$ 0.03     | 0.79 $\pm$ 0.04   | 0.81 $\pm$ 0.02     | 0.07                                       | 0.86 $\pm$ 0.14 | 0.17                                       |
| DBP, mmHg               | 14,148 | 0.43 $\pm$ 0.08   | 0.61 $\pm$ 0.03     | 0.85 $\pm$ 0.04   | 0.82 $\pm$ 0.02     | <b>2<math>\times</math>10<sup>-2</sup></b> | 0.95 $\pm$ 0.21 | 0.40                                       |

Significant estimates are marked in bold. None of the results withstand the Bonferroni corrected  $p$ -value of 0.00019.

TC, total cholesterol; TG, triacylglycerol. Physical activity variable was categorized on two categories (inactive and active).

$\sigma_G$ : Genetic standard deviation;  $\sigma_E$ : Environmental standard deviation;  $\sigma$   $p$ -value:  $p$ -value of the variance homogeneity null hypothesis;  $\rho_G$ : genetic correlation;  $\rho_G$   $p$ -value:  $p$ -value of the genetic correlation equal to 1 null hypothesis.

**ESM Table 6.** Variance components parameters estimates ( $\pm$ s.e.) for genotype-smoking status interactions on 11 cardiometabolic traits

| Phenotypes              | $N$    | $\sigma_G$ Non-smokers | $\sigma_G$ Smokers | $\sigma_E$ Non-smokers | $\sigma_E$ Smokers | $\sigma$ $p$ -value | $\rho_G$        | $\rho_G$ $p$ -value                        |
|-------------------------|--------|------------------------|--------------------|------------------------|--------------------|---------------------|-----------------|--------------------------------------------|
| Weight, kg              | 10,677 | 0.69 $\pm$ 0.03        | 0.69 $\pm$ 0.05    | 0.72 $\pm$ 0.03        | 0.71 $\pm$ 0.05    | 0.90                | 0.79 $\pm$ 0.11 | <b>4<math>\times</math>10<sup>-2</sup></b> |
| BMI, kg/m <sup>2</sup>  | 10,668 | 0.67 $\pm$ 0.03        | 0.65 $\pm$ 0.05    | 0.74 $\pm$ 0.03        | 0.75 $\pm$ 0.05    | 0.67                | 0.84 $\pm$ 0.12 | 0.09                                       |
| Waist circumference, cm | 1,143  | 0.01 $\pm$ 0.33        | 0.95 $\pm$ 0.26    | 0.98 $\pm$ 0.03        | 0.38 $\pm$ 0.65    | 0.17                | 1               | -                                          |
| TC, mmol/l              | 9,423  | 0.63 $\pm$ 0.03        | 0.65 $\pm$ 0.05    | 0.75 $\pm$ 0.02        | 0.79 $\pm$ 0.04    | 0.70                | 1               | -                                          |
| HDL-C, mmol/l           | 1,974  | 0.59 $\pm$ 0.12        | 0.60 $\pm$ 0.27    | 0.81 $\pm$ 0.08        | 0.78 $\pm$ 0.20    | 0.98                | 1               | -                                          |
| LDL-C, mmol/l           | 1,914  | 0.69 $\pm$ 0.11        | 0.64 $\pm$ 0.19    | 0.69 $\pm$ 0.10        | 0.81 $\pm$ 0.15    | 0.82                | 1               | -                                          |
| TG, mmol/l              | 7,683  | 0.57 $\pm$ 0.04        | 0.60 $\pm$ 0.08    | 0.74 $\pm$ 0.03        | 0.93 $\pm$ 0.05    | 0.76                | 1               | -                                          |
| Fasting glucose, mmol/l | 9,510  | 0.57 $\pm$ 0.04        | 0.48 $\pm$ 0.09    | 0.81 $\pm$ 0.03        | 0.89 $\pm$ 0.05    | 0.25                | 0.68 $\pm$ 0.24 | 0.12                                       |
| 2 h glucose, mmol/l     | 8,934  | 0.52 $\pm$ 0.04        | 0.54 $\pm$ 0.08    | 0.84 $\pm$ 0.03        | 0.86 $\pm$ 0.05    | 0.78                | 0.97 $\pm$ 0.24 | 0.46                                       |
| SBP, mmHg               | 10,522 | 0.64 $\pm$ 0.03        | 0.57 $\pm$ 0.05    | 0.78 $\pm$ 0.03        | 0.80 $\pm$ 0.04    | 0.31                | 1               | -                                          |
| DBP, mmHg               | 10,519 | 0.56 $\pm$ 0.04        | 0.56 $\pm$ 0.06    | 0.82 $\pm$ 0.02        | 0.84 $\pm$ 0.04    | 0.98                | 1               | -                                          |

Significant estimates are marked in bold. None of the results withstand the Bonferroni corrected  $p$ -value of 0.00019.

TC, total cholesterol; TG, triacylglycerol. Smoking status variable was categorized in two categories (smokers and non-smokers).

$\sigma_G$ : Genetic standard deviation;  $\sigma_E$ : Environmental standard deviation;  $\sigma$   $p$ -value:  $p$ -value of the variance homogeneity null hypothesis;  $\rho_G$ : genetic correlation;  $\rho_G$   $p$ -value:  $p$ -value of the genetic correlation equal to 1 null hypothesis.

**ESM Table 7.** Variance components parameters estimates for genotype-alcohol intake interactions on 11 cardiometabolic traits

| Phenotypes              | $N$    | $\alpha_G$ | $\gamma_G$ | $\lambda$ | $\alpha_E$ | $\gamma_E$ | $\gamma_G$ $p$ -value                 | $\lambda$ $p$ -value                  |
|-------------------------|--------|------------|------------|-----------|------------|------------|---------------------------------------|---------------------------------------|
| Weight, kg              | 12,640 | -0.3658    | 0.0501     | 0.1692    | -1.4583    | -0.4680    | <b><math>1 \times 10^{-5}</math>*</b> | <b><math>7 \times 10^{-7}</math>*</b> |
| BMI, kg/m <sup>2</sup>  | 12,632 | -0.5156    | 0.0432     | 0.1353    | -1.1108    | -0.3938    | <b><math>3 \times 10^{-4}</math></b>  | <b><math>5 \times 10^{-3}</math></b>  |
| Waist circumference, cm | 1,773  | -2.1234    | -0.7836    | 0         | -0.3446    | 0.0303     | 1                                     | 0.50                                  |
| TC, mmol/l              | 11,300 | -0.8384    | -0.0981    | 0         | -0.5819    | 0.0285     | 0.10                                  | 0.50                                  |
| HDL-C, mmol/l           | 2,141  | -0.4385    | 0.0617     | 0.1640    | -1.0869    | -0.0831    | 0.30                                  | 0.11                                  |
| LDL-C, mmol/l           | 2,120  | -0.7464    | -0.0175    | 0.0073    | -0.6546    | -0.0142    | 0.78                                  | 0.47                                  |
| TG, mmol/l              | 9,797  | -0.9303    | 0.0151     | 0.0543    | -0.5132    | 0.0423     | 0.69                                  | 0.17                                  |
| Fasting glucose, mmol/l | 11,298 | -1.4051    | -0.1374    | 0         | -0.2970    | 0.0224     | 0.23                                  | 0.50                                  |
| 2 h glucose, mmol/l     | 10,675 | -1.5793    | -0.3111    | 0         | -0.2770    | 0.0568     | <b><math>4 \times 10^{-3}</math></b>  | 0.50                                  |
| SBP, mmHg               | 12,464 | -0.9552    | -0.1070    | 0.0964    | -0.5009    | 0.0255     | 0.12                                  | 0.07                                  |
| DBP, mmHg               | 12,459 | -1.0945    | -0.0555    | 0.0755    | -0.4143    | 0.0325     | 0.36                                  | 0.14                                  |

Significant estimates are marked in bold. \* Withstand the Bonferroni corrected  $p$ -value of 0.00019.

TC, total cholesterol; TG, triacylglycerol.

$\alpha_G$ ,  $\gamma_G$ ,  $\lambda$ ,  $\alpha_e$  and  $\gamma_e$  are parameters estimated in the genotype-environment interaction model for continuous environmental exposures (see Eq. 4 and 5).  $\gamma_G$   $p$ -value:  $p$ -value of the variance homogeneity null hypothesis;  $\lambda$   $p$ -value:  $p$ -value of the genetic correlation equal to 1 null hypothesis.



**ESM Table 8.** Variance components parameters estimates for genotype-diet pattern interactions on 11 cardiometabolic traits

| Phenotypes              | $N$    | $\alpha_G$ | $\gamma_G$ | $\lambda$ | $\alpha_E$ | $\gamma_E$ | $\gamma_G$ $p$ -value                | $\lambda$ $p$ -value                 |
|-------------------------|--------|------------|------------|-----------|------------|------------|--------------------------------------|--------------------------------------|
| Weight, kg              | 12,640 | -0.5710    | 0.0496     | 0.0446    | -0.8483    | -0.0155    | 0.33                                 | <b><math>3 \times 10^{-2}</math></b> |
| BMI, kg/m <sup>2</sup>  | 12,632 | -0.6104    | 0.0085     | 0.0700    | -0.7873    | -0.0305    | 0.87                                 | <b><math>1 \times 10^{-2}</math></b> |
| Waist circumference, cm | 1,773  | -0.2747    | 0.0437     | 0.2306    | -1.6262    | -0.2328    | 0.30                                 | 0.05                                 |
| TC, mmol/l              | 11,300 | -0.8216    | -0.0568    | 0         | -0.5870    | 0.0187     | 0.18                                 | 0.50                                 |
| HDL-C, mmol/l           | 2,141  | -0.6773    | 0.0195     | 0         | -0.7263    | -0.0408    | 0.78                                 | 0.50                                 |
| LDL-C, mmol/l           | 2,120  | -0.8408    | -0.1349    | 0         | -0.6227    | 0.0730     | 0.17                                 | 0.50                                 |
| TG, mmol/l              | 9,797  | -1.0116    | 0.0687     | 0         | -0.4752    | 0.0619     | 0.27                                 | 0.50                                 |
| Fasting glucose, mmol/l | 11,298 | -1.0490    | -0.0890    | 0.1542    | -0.4487    | 0.0429     | 0.13                                 | <b><math>6 \times 10^{-3}</math></b> |
| 2 h glucose, mmol/l     | 10,675 | -1.1781    | 0.0806     | 0.0993    | -0.3771    | -0.0232    | 0.18                                 | <b><math>5 \times 10^{-2}</math></b> |
| SBP, mmHg               | 12,464 | -1.0752    | -0.1182    | 0.0004    | -0.4354    | 0.0225     | <b><math>2 \times 10^{-2}</math></b> | 0.50                                 |
| DBP, mmHg               | 12,459 | -1.2013    | -0.0669    | 0         | -0.3659    | 0.0326     | 0.38                                 | 0.50                                 |

Significant estimates are marked in bold. None of the results withstand the Bonferroni corrected  $p$ -value of 0.00019.

TC, total cholesterol; TG, triacylglycerol.

$\alpha_G$ ,  $\gamma_G$ ,  $\lambda$ ,  $\alpha_E$  and  $\gamma_E$  are parameters estimated in the genotype-environment interaction model for continuous environmental exposures (see Eq. 4 and 5).  $\gamma_G$   $p$ -value:  $p$ -value of the variance homogeneity null hypothesis;  $\lambda$   $p$ -value:  $p$ -value of the genetic correlation equal to 1 null hypothesis.

**ESM Table 9.** Variance components parameters estimates for genotype-carbohydrate intake interactions on 11 cardiometabolic traits

| Phenotypes              | $N$    | $\alpha_G$ | $\gamma_G$ | $\lambda$ | $\alpha_E$ | $\gamma_E$ | $\gamma_G$ $p$ -value     | $\lambda$ $p$ -value      |
|-------------------------|--------|------------|------------|-----------|------------|------------|---------------------------|---------------------------|
| Weight, kg              | 12,640 | -0.5892    | -0.0050    | 0.0111    | -0.8187    | -0.0074    | 0.78                      | 0.08                      |
| BMI, kg/m <sup>2</sup>  | 12,632 | -0.6357    | 0.0130     | 0.0184    | -0.7614    | -0.0119    | 0.46                      | <b>2</b> $\times 10^{-2}$ |
| Waist circumference, cm | 1,773  | -0.2298    | -0.0054    | 0.1029    | -1.6915    | 0.0462     | 0.66                      | <b>2</b> $\times 10^{-2}$ |
| TC, mmol/l              | 11,300 | -0.8269    | 0.0220     | 0         | -0.5848    | -0.0053    | 0.06                      | 0.50                      |
| HDL-C, mmol/l           | 2,141  | -0.5920    | -0.0030    | 0.0055    | -0.8209    | 0.0088     | 0.88                      | 0.45                      |
| LDL-C, mmol/l           | 2,120  | -0.8437    | 0.0530     | 0         | -0.6435    | -0.0280    | <b>4</b> $\times 10^{-2}$ | 0.50                      |
| TG, mmol/l              | 9,797  | -1.0175    | -0.0117    | 0         | -0.4746    | -0.0270    | 0.56                      | 0.50                      |
| Fasting glucose, mmol/l | 11,298 | -1.0650    | 0.0185     | 0.0490    | -0.4352    | -0.0150    | 0.38                      | <b>9</b> $\times 10^{-3}$ |
| 2 h glucose, mmol/l     | 10,675 | -1.2305    | -0.0257    | 0.0254    | -0.3532    | 0.0052     | 0.39                      | 0.09                      |
| SBP, mmHg               | 12,464 | -1.0757    | 0.0385     | 0         | -0.4364    | -0.0116    | <b>1</b> $\times 10^{-2}$ | 0.50                      |
| DBP, mmHg               | 12,459 | -1.2057    | 0.0300     | 0         | -0.3694    | -0.0145    | 0.13                      | 0.50                      |

Significant estimates are marked in bold. None of the results withstand the Bonferroni corrected  $p$ -value of 0.00019.

TC, total cholesterol; TG, triacylglycerol.

$\alpha_G$ ,  $\gamma_G$ ,  $\lambda$ ,  $\alpha_E$  and  $\gamma_E$  are parameters estimated in the genotype-environment interaction model for continuous environmental exposures (see Eq. 4 and 5).  $\gamma_G$   $p$ -value:  $p$ -value of the variance homogeneity null hypothesis;  $\lambda$   $p$ -value:  $p$ -value of the genetic correlation equal to 1 null hypothesis.

**ESM Table 10.** Variance components parameters estimates for genotype-protein intake interactions on 11 cardiometabolic traits

| Phenotypes              | $N$    | $\alpha_G$ | $\gamma_G$ | $\lambda$ | $\alpha_E$ | $\gamma_E$ | $\gamma_G$ $p$ -value                | $\lambda$ $p$ -value                 |
|-------------------------|--------|------------|------------|-----------|------------|------------|--------------------------------------|--------------------------------------|
| Weight, kg              | 12,640 | -0.5469    | 0.0633     | 0.0541    | -0.8847    | -0.0163    | 0.48                                 | <b><math>1 \times 10^{-2}</math></b> |
| BMI, kg/m <sup>2</sup>  | 12,632 | -0.6410    | 0.0790     | 0.0607    | -0.7697    | 0.0369     | 0.07                                 | <b><math>2 \times 10^{-2}</math></b> |
| Waist circumference, cm | 1,773  | -0.8454    | 0.0371     | 0.0206    | -0.5888    | 0.0589     | 0.59                                 | 0.45                                 |
| TC, mmol/l              | 11,300 | -0.7721    | -0.0590    | 0.0242    | -0.6307    | 0.0326     | 0.20                                 | 0.22                                 |
| HDL-C, mmol/l           | 2,141  | -0.1986    | -0.0029    | 0.2265    | -1.7454    | -0.0090    | 0.95                                 | 0.06                                 |
| LDL-C, mmol/l           | 2,120  | -0.8343    | 0.0546     | 0         | -0.6071    | -0.0875    | 0.28                                 | 0.50                                 |
| TG, mmol/l              | 9,797  | -1.0054    | 0.1508     | 0         | -0.4986    | -0.0129    | <b><math>1 \times 10^{-2}</math></b> | 0.50                                 |
| Fasting glucose, mmol/l | 11,298 | -1.2205    | 0.1154     | 0.0633    | -0.3687    | -0.0082    | 0.33                                 | 0.18                                 |
| 2 h glucose, mmol/l     | 10,675 | -1.2601    | -0.1374    | 0.0752    | -0.3600    | 0.0584     | <b><math>3 \times 10^{-2}</math></b> | 0.11                                 |
| SBP, mmHg               | 12,464 | -1.0134    | 0.0565     | 0.0228    | -0.4570    | 0.0060     | 0.36                                 | 0.27                                 |
| DBP, mmHg               | 12,459 | -1.1653    | 0.0476     | 0.0153    | -0.3787    | -0.0176    | 0.55                                 | 0.36                                 |

Significant estimates are marked in bold. None of the results withstand the Bonferroni corrected  $p$ -value of 0.00019.

TC, total cholesterol; TG, triacylglycerol.

$\alpha_G$ ,  $\gamma_G$ ,  $\lambda$ ,  $\alpha_E$  and  $\gamma_E$  are parameters estimated in the genotype-environment interaction model for continuous environmental exposures (see Eq. 4 and 5).  $\gamma_G$   $p$ -value:  $p$ -value of the variance homogeneity null hypothesis;  $\lambda$   $p$ -value:  $p$ -value of the genetic correlation equal to 1 null hypothesis.

**ESM Table 11.** Variance components parameters estimates for genotype-fibre intake interactions on 11 cardiometabolic traits

| Phenotypes              | $N$    | $\alpha_G$ | $\gamma_G$ | $\lambda$ | $\alpha_E$ | $\gamma_E$ | $\gamma_G$ $p$ -value                | $\lambda$ $p$ -value |
|-------------------------|--------|------------|------------|-----------|------------|------------|--------------------------------------|----------------------|
| Weight, kg              | 12,640 | -0.6622    | -0.0884    | 0         | -0.7362    | 0.1194     | 0.50                                 | 0.50                 |
| BMI, kg/m <sup>2</sup>  | 12,632 | -0.7489    | 0.1351     | 0.0065    | -0.6484    | 0.1310     | 0.40                                 | 0.47                 |
| Waist circumference, cm | 1,773  | -0.4229    | 0.0385     | 0.4968    | -1.1072    | 0.2548     | 0.83                                 | 0.14                 |
| TC, mmol/l              | 11,300 | -0.7805    | 0.0545     | 0.0429    | -0.6149    | 0.0420     | 0.71                                 | 0.34                 |
| HDL-C, mmol/l           | 2,141  | -0.5287    | 0.0802     | 0.2652    | -0.9063    | 0.0274     | 0.64                                 | 0.32                 |
| LDL-C, mmol/l           | 2,120  | -0.7305    | -0.0638    | 0         | -0.6740    | 0.1548     | 0.82                                 | 0.50                 |
| TG, mmol/l              | 9,797  | -0.9766    | 0.1316     | 0.0827    | -0.5140    | -0.4016    | 0.26                                 | 0.25                 |
| Fasting glucose, mmol/l | 11,298 | -1.3461    | 0.2015     | 0.0192    | -0.3134    | 0.0984     | 0.41                                 | 0.45                 |
| 2 h glucose, mmol/l     | 10,675 | -1.2774    | -0.2798    | 0.1916    | -0.3360    | 0.1006     | 0.37                                 | 0.23                 |
| SBP, mmHg               | 12,464 | -1.0820    | 0.4028     | 0         | -0.4338    | -0.0353    | <b><math>2 \times 10^{-3}</math></b> | 0.50                 |
| DBP, mmHg               | 12,459 | -1.2068    | 0.2737     | 0         | -0.3677    | -0.1398    | 0.08                                 | 0.50                 |

Significant estimates are marked in bold. None of the results withstand the Bonferroni corrected  $p$ -value of 0.00019.

TC, total cholesterol; TG, triacylglycerol.

$\alpha_G$ ,  $\gamma_G$ ,  $\lambda$ ,  $\alpha_E$  and  $\gamma_E$  are parameters estimated in the genotype-environment interaction model for continuous environmental exposures (see Eq. 4 and 5).  $\gamma_G$   $p$ -value:  $p$ -value of the variance homogeneity null hypothesis;  $\lambda$   $p$ -value:  $p$ -value of the genetic correlation equal to 1 null hypothesis.

**ESM Table 12.** Variance components parameters estimates for genotype-total fat intake interactions on 11 cardiometabolic traits

| Phenotypes              | $N$    | $\alpha_G$ | $\gamma_G$ | $\lambda$ | $\alpha_E$ | $\gamma_E$ | $\gamma_G$ $p$ -value | $\lambda$ $p$ -value                 |
|-------------------------|--------|------------|------------|-----------|------------|------------|-----------------------|--------------------------------------|
| Weight, kg              | 12,640 | -0.5691    | 0.0194     | 0.0152    | -0.8546    | -0.0103    | 0.14                  | <b><math>2 \times 10^{-2}</math></b> |
| BMI, kg/m <sup>2</sup>  | 12,632 | -0.5984    | 0.0088     | 0.0261    | -0.8079    | -0.0183    | 0.52                  | <b><math>3 \times 10^{-3}</math></b> |
| Waist circumference, cm | 1,773  | -0.3612    | 0.0163     | 0.0562    | -1.3263    | -0.0618    | 0.27                  | 0.1                                  |
| TC, mmol/l              | 11,300 | -0.8185    | -0.0140    | 0         | -0.5867    | 0.0048     | 0.27                  | 0.50                                 |
| HDL-C, mmol/l           | 2,141  | -0.6748    | 0.0012     | 0         | -0.7288    | -0.0157    | 0.95                  | 0.50                                 |
| LDL-C, mmol/l           | 2,120  | -0.8026    | -0.0347    | 0         | -0.6344    | 0.0191     | 0.39                  | 0.50                                 |
| TG, mmol/l              | 9,797  | -1.0060    | 0.0191     | 0         | -0.4737    | 0.0189     | 0.16                  | 0.50                                 |
| Fasting glucose, mmol/l | 11,298 | -1.0811    | -0.0272    | 0.0453    | -0.4315    | 0.0174     | 0.22                  | <b><math>1 \times 10^{-2}</math></b> |
| 2 h glucose, mmol/l     | 10,675 | -1.1759    | 0.0295     | 0.0343    | -0.3788    | -0.0054    | 0.10                  | <b><math>4 \times 10^{-2}</math></b> |
| SBP, mmHg               | 12,464 | -1.0707    | -0.0346    | 0         | -0.4340    | 0.0081     | 0.07                  | 0.50                                 |
| DBP, mmHg               | 12,459 | -1.1845    | -0.0155    | 0.0018    | -0.3698    | 0.0072     | 0.65                  | 0.45                                 |

Significant estimates are marked in bold. None of the results withstand the Bonferroni corrected  $p$ -value of 0.00019.

TC, total cholesterol; TG, triacylglycerol.

$\alpha_G$ ,  $\gamma_G$ ,  $\lambda$ ,  $\alpha_E$  and  $\gamma_E$  are parameters estimated in the genotype-environment interaction model for continuous environmental exposures (see Eq. 4 and 5).  $\gamma_G$   $p$ -value:  $p$ -value of the variance homogeneity null hypothesis;  $\lambda$   $p$ -value:  $p$ -value of the genetic correlation equal to 1 null hypothesis.

**ESM Table 13.** Variance components parameters estimates for genotype-saturated fat intake interactions on 11 cardiometabolic traits

| Phenotypes              | $N$    | $\alpha_G$ | $\gamma_G$ | $\lambda$ | $\alpha_E$ | $\gamma_E$ | $\gamma_G$ $p$ -value                | $\lambda$ $p$ -value                 |
|-------------------------|--------|------------|------------|-----------|------------|------------|--------------------------------------|--------------------------------------|
| Weight, kg              | 12,640 | -0.5273    | 0.0255     | 0.0411    | -0.9139    | -0.0401    | 0.14                                 | <b><math>3 \times 10^{-3}</math></b> |
| BMI, kg/m <sup>2</sup>  | 12,632 | -0.5786    | 0.0192     | 0.0569    | -0.8502    | -0.0663    | 0.23                                 | <b><math>4 \times 10^{-4}</math></b> |
| Waist circumference, cm | 1,773  | -0.6582    | 0.0243     | 0.0260    | -0.7769    | -0.0633    | 0.43                                 | 0.36                                 |
| TC, mmol/l              | 11,300 | -0.8111    | -0.0063    | 0         | -0.5893    | -0.0030    | 0.82                                 | 0.50                                 |
| HDL-C, mmol/l           | 2,141  | -0.6645    | -0.0105    | 0         | -0.7376    | -0.0193    | 0.78                                 | 0.50                                 |
| LDL-C, mmol/l           | 2,120  | -0.7685    | -0.0434    | 0         | -0.6445    | 0.0114     | 0.60                                 | 0.50                                 |
| TG, mmol/l              | 9,797  | -0.9924    | 0.0063     | 0         | -0.4696    | 0.0080     | 0.77                                 | 0.50                                 |
| Fasting glucose, mmol/l | 11,298 | -1.1116    | 0.0670     | 0.0774    | -0.4234    | -0.0354    | <b><math>2 \times 10^{-2}</math></b> | <b><math>2 \times 10^{-2}</math></b> |
| 2 h glucose, mmol/l     | 10,675 | -1.2858    | 0.0465     | 0.0309    | -0.3306    | -0.0105    | 0.19                                 | 0.17                                 |
| SBP, mmHg               | 12,464 | -1.0633    | -0.0647    | 0.0026    | -0.4376    | 0.0130     | 0.10                                 | 0.46                                 |
| DBP, mmHg               | 12,459 | -1.1070    | -0.0231    | 0.0256    | -0.4047    | 0.0080     | 0.63                                 | 0.19                                 |

Significant estimates are marked in bold. None of the results withstand the Bonferroni corrected  $p$ -value of 0.00019.

TC, total cholesterol; TG, triacylglycerol.

$\alpha_G$ ,  $\gamma_G$ ,  $\lambda$ ,  $\alpha_E$  and  $\gamma_E$  are parameters estimated in the genotype-environment interaction model for continuous environmental exposures (see Eq. 4 and 5).  $\gamma_G$   $p$ -value:  $p$ -value of the variance homogeneity null hypothesis;  $\lambda$   $p$ -value:  $p$ -value of the genetic correlation equal to 1 null hypothesis.

**ESM Table 14.** Variance components parameters estimates for genotype-essential fatty acids intake interactions on 11 cardiometabolic traits

| Phenotypes              | $N$    | $\alpha_G$ | $\gamma_G$ | $\lambda$ | $\alpha_E$ | $\gamma_E$ | $\gamma_G$ $p$ -value    | $\lambda$ $p$ -value     |
|-------------------------|--------|------------|------------|-----------|------------|------------|--------------------------|--------------------------|
| Weight, kg              | 12,640 | -0.6282    | 0.0307     | 0.0229    | -0.7730    | 0.0405     | 0.58                     | 0.27                     |
| BMI, kg/m <sup>2</sup>  | 12,632 | -0.7026    | 0.0458     | 0.0359    | -0.6871    | -0.0072    | 0.37                     | 0.17                     |
| Waist circumference, cm | 1,773  | -0.0672    | 0.0138     | 0.7816    | -3.5709    | -0.8476    | 0.66                     | 0.12                     |
| TC, mmol/l              | 11,300 | -0.8251    | -0.0918    | 0         | -0.5865    | 0.0346     | 0.16                     | 0.50                     |
| HDL-C, mmol/l           | 2,141  | -0.7081    | 0.0487     | 0         | -0.6958    | -0.0243    | 0.72                     | 0.50                     |
| LDL-C, mmol/l           | 2,120  | -0.8031    | -0.0629    | 0         | -0.6103    | 0.0315     | 0.54                     | 0.50                     |
| TG, mmol/l              | 9,797  | -1.0157    | 0.0940     | 0         | -0.4696    | 0.0591     | <b>4×10<sup>-2</sup></b> | 0.50                     |
| Fasting glucose, mmol/l | 11,298 | -1.1138    | -0.1005    | 0.1934    | -0.4090    | 0.0369     | 0.20                     | <b>3×10<sup>-2</sup></b> |
| 2 h glucose, mmol/l     | 10,675 | -1.3978    | 0.0720     | 0         | -0.2886    | -0.0226    | 0.37                     | 0.50                     |
| SBP, mmHg               | 12,464 | -1.0518    | 0.0931     | 0.0073    | -0.4422    | -0.0644    | 0.06                     | 0.42                     |
| DBP, mmHg               | 12,459 | -1.1939    | 0.1056     | 0.0048    | -0.3725    | -0.0466    | <b>4×10<sup>-2</sup></b> | 0.46                     |

Significant estimates are marked in bold. None of the results withstand the Bonferroni corrected  $p$ -value of 0.00019.

TC, total cholesterol; TG, triacylglycerol.

$\alpha_G$ ,  $\gamma_G$ ,  $\lambda$ ,  $\alpha_E$  and  $\gamma_E$  are parameters estimated in the genotype-environment interaction model for continuous environmental exposures (see Eq. 4 and 5).  $\gamma_G$   $p$ -value:  $p$ -value of the variance homogeneity null hypothesis;  $\lambda$   $p$ -value:  $p$ -value of the genetic correlation equal to 1 null hypothesis.

**ESM Table 15.** Variance components parameters estimates for genotype-polyunsaturated fat intake interactions on 11 cardiometabolic traits

| Phenotypes              | $N$    | $\alpha_G$ | $\gamma_G$ | $\lambda$ | $\alpha_E$ | $\gamma_E$ | $\gamma_G$ $p$ -value    | $\lambda$ $p$ -value     |
|-------------------------|--------|------------|------------|-----------|------------|------------|--------------------------|--------------------------|
| Weight, kg              | 12,640 | -0.6181    | 0.0338     | 0.0311    | -0.7869    | 0.0529     | 0.37                     | 0.18                     |
| BMI, kg/m <sup>2</sup>  | 12,632 | -0.6920    | 0.0372     | 0.0473    | -0.6973    | 0.0163     | 0.32                     | 0.11                     |
| Waist circumference, cm | 1,773  | -0.6584    | 0.0539     | 0.1357    | -0.7597    | -0.0626    | 0.58                     | 0.35                     |
| TC, mmol/l              | 11,300 | -0.8240    | -0.0796    | 0         | -0.5863    | 0.0372     | 0.19                     | 0.50                     |
| HDL-C, mmol/l           | 2,141  | -0.7137    | 0.0537     | 0         | -0.6918    | -0.0256    | 0.57                     | 0.50                     |
| LDL-C, mmol/l           | 2,120  | -0.8003    | -0.0723    | 0         | -0.6161    | 0.0478     | 0.48                     | 0.50                     |
| TG, mmol/l              | 9,797  | -1.0194    | 0.1066     | 0         | -0.4689    | 0.0495     | <b>3×10<sup>-2</sup></b> | 0.50                     |
| Fasting glucose, mmol/l | 11,298 | -1.0603    | -0.0895    | 0.2241    | -0.4365    | 0.0417     | 0.17                     | <b>1×10<sup>-2</sup></b> |
| 2 h glucose, mmol/l     | 10,675 | -1.4079    | 0.0828     | 0         | -0.2863    | -0.0241    | 0.29                     | 0.50                     |
| SBP, mmHg               | 12,464 | -1.0301    | 0.0894     | 0.0214    | -0.4548    | -0.0686    | 0.05                     | 0.30                     |
| DBP, mmHg               | 12,459 | -1.2055    | 0.1083     | 0         | -0.3682    | -0.0482    | <b>4×10<sup>-2</sup></b> | 0.50                     |

Significant estimates are marked in bold. None of the results withstand the Bonferroni corrected  $p$ -value of 0.00019.

TC, total cholesterol; TG, triacylglycerol.

$\alpha_G$ ,  $\gamma_G$ ,  $\lambda$ ,  $\alpha_E$  and  $\gamma_E$  are parameters estimated in the genotype-environment interaction model for continuous environmental exposures (see Eq. 4 and 5).  $\gamma_G$   $p$ -value:  $p$ -value of the variance homogeneity null hypothesis;  $\lambda$   $p$ -value:  $p$ -value of the genetic correlation equal to 1 null hypothesis.



**ESM Table 16.** Variance components parameters estimates for genotype-monounsaturated fat intake interactions on 11 cardiometabolic traits

| Phenotypes              | $N$    | $\alpha_G$ | $\gamma_G$ | $\lambda$ | $\alpha_E$ | $\gamma_E$ | $\gamma_G$ $p$ -value | $\lambda$ $p$ -value                 |
|-------------------------|--------|------------|------------|-----------|------------|------------|-----------------------|--------------------------------------|
| Weight, kg              | 12,640 | -0.5788    | 0.0322     | 0.0366    | -0.8356    | 0.0245     | 0.33                  | <b><math>4 \times 10^{-2}</math></b> |
| BMI, kg/m <sup>2</sup>  | 12,632 | -0.6489    | 0.0014     | 0.0475    | -0.7412    | 0.0120     | 0.96                  | <b><math>3 \times 10^{-2}</math></b> |
| Waist circumference, cm | 1,773  | -0.2592    | 0.0650     | 0.2758    | -1.7000    | -0.2205    | 0.09                  | <b><math>3 \times 10^{-2}</math></b> |
| TC, mmol/l              | 11,300 | -0.8221    | -0.0464    | 0         | -0.5857    | 0.0175     | 0.15                  | 0.50                                 |
| HDL-C, mmol/l           | 2,141  | -0.7020    | 0.0300     | 0         | -0.7037    | -0.0387    | 0.63                  | 0.50                                 |
| LDL-C, mmol/l           | 2,120  | -0.5298    | -0.0649    | 0.1001    | -0.9257    | 0.0515     | 0.79                  | 0.25                                 |
| TG, mmol/l              | 9,797  | -1.0165    | 0.0956     | 0         | -0.4742    | 0.0319     | 0.32                  | 0.50                                 |
| Fasting glucose, mmol/l | 11,298 | -1.1380    | -0.0848    | 0.0961    | -0.4022    | 0.0343     | 0.11                  | <b><math>4 \times 10^{-2}</math></b> |
| 2 h glucose, mmol/l     | 10,675 | -1.0631    | 0.0575     | 0.1415    | -0.4321    | -0.0292    | 0.21                  | <b><math>6 \times 10^{-3}</math></b> |
| SBP, mmHg               | 12,464 | -0.9912    | -0.0686    | 0.0340    | -0.4727    | -0.0064    | 0.08                  | 0.21                                 |
| DBP, mmHg               | 12,459 | -1.1823    | -0.0393    | 0.0066    | -0.3700    | 0.0125     | 0.47                  | 0.44                                 |

Significant estimates are marked in bold. None of the results withstand the Bonferroni corrected  $p$ -value of 0.00019.

TC, total cholesterol; TG, triacylglycerol.

$\alpha_G$ ,  $\gamma_G$ ,  $\lambda$ ,  $\alpha_E$  and  $\gamma_E$  are parameters estimated in the genotype-environment interaction model for continuous environmental exposures (see Eq. 4 and 5).  $\gamma_G$   $p$ -value:  $p$ -value of the variance homogeneity null hypothesis;  $\lambda$   $p$ -value:  $p$ -value of the genetic correlation equal to 1 null hypothesis.

**ESM Table 17.** Sensitivity analyses for glycaemic and lipid traits excluding non-fasted individuals

a) Heritability estimates ( $h^2$ ) of glycaemic and lipid traits

| Phenotypes              | <i>N</i> | $h^2$ | S.E. | <i>p</i> -value     |
|-------------------------|----------|-------|------|---------------------|
| TC, mmol/l              | 11,916   | 0.41  | 0.03 | $2 \times 10^{-64}$ |
| HDL-C, mmol/l           | 2,278    | 0.42  | 0.12 | $4 \times 10^{-4}$  |
| LDL-C, mmol/l           | 2,256    | 0.44  | 0.12 | $8 \times 10^{-5}$  |
| TG, mmol/l              | 10,392   | 0.36  | 0.03 | $8 \times 10^{-42}$ |
| Fasting glucose, mmol/l | 12,043   | 0.27  | 0.03 | $2 \times 10^{-36}$ |
| 2 h glucose, mmol/l     | 11,360   | 0.27  | 0.03 | $2 \times 10^{-26}$ |

TC, total cholesterol; TG, triacylglycerol.

b) Variance components parameters estimates for genotype-age interactions on glycaemic and lipid traits

| Phenotypes              | $N$    | $\alpha_G$ | $\gamma_G$ | $\lambda$ | $\alpha_E$ | $\gamma_E$ | $\gamma_G$ $p$ -value | $\lambda$ $p$ -value |
|-------------------------|--------|------------|------------|-----------|------------|------------|-----------------------|----------------------|
| TC, mmol/l              | 11,916 | -0.8155    | 0.0031     | 0.0118    | -0.5961    | 0.0126     | 0.73                  | 0.08                 |
| HDL-C, mmol/l           | 2,278  | -0.9072    | -0.0292    | 0.0005    | -0.543     | 0.0043     | 0.3                   | 0.49                 |
| LDL-C, mmol/l           | 2,256  | -0.8234    | 0.0065     | 0         | -0.589     | 0.0006     | 0.76                  | 0.5                  |
| TG, mmol/l              | 10,392 | -1.034     | 0.006      | 0         | -0.4513    | 0.0034     | 0.43                  | 0.5                  |
| Fasting glucose, mmol/l | 12,043 | -1.2952    | 0.0232     | 0         | -0.3501    | 0.0223     | 0.35                  | 0.5                  |
| 2 h glucose, mmol/l     | 11,360 | -1.1764    | 0.0297     | 0.0217    | -0.3945    | 0.0224     | 0.08                  | 0.07                 |

TC, total cholesterol; TG, triacylglycerol.

$\alpha_G$ ,  $\gamma_G$ ,  $\lambda$ ,  $\alpha_E$  and  $\gamma_E$  are parameters estimated in the genotype-environment interaction model for continuous environmental exposures (see Eq. 4 and 5).  $\gamma_G$   $p$ -value:  $p$ -value of the variance homogeneity null hypothesis;  $\lambda$   $p$ -value:  $p$ -value of the genetic correlation equal to 1 null hypothesis.

c) Variance components parameters estimates ( $\pm$ s.e.) for genotype-sex interactions on glycaemic and lipid traits

| Phenotypes              | $N$    | $\sigma_G$ Females | $\sigma_G$ Males | $\sigma_E$ Females | $\sigma_E$ Males | $\sigma$ $p$ -value                         | $\rho_G$        | $\rho_G$ $p$ -value                        |
|-------------------------|--------|--------------------|------------------|--------------------|------------------|---------------------------------------------|-----------------|--------------------------------------------|
| TC, mmol/l              | 11,916 | 0.66 $\pm$ 0.04    | 0.67 $\pm$ 0.04  | 0.74 $\pm$ 0.03    | 0.74 $\pm$ 0.03  | 0.78                                        | 0.82 $\pm$ 0.09 | <b>3<math>\times</math>10<sup>-2</sup></b> |
| HDL-C, mmol/l           | 2,278  | 0.77 $\pm$ 0.17    | 0.77 $\pm$ 0.12  | 0.72 $\pm$ 0.18    | 0.53 $\pm$ 0.16  | 0.99                                        | 0.36 $\pm$ 0.32 | <b>5<math>\times</math>10<sup>-2</sup></b> |
| LDL-C, mmol/l           | 2,256  | 0.68 $\pm$ 0.13    | 0.64 $\pm$ 0.15  | 0.71 $\pm$ 0.13    | 0.79 $\pm$ 0.12  | 0.85                                        | 1               | -                                          |
| TG, mmol/l              | 10,392 | 0.57 $\pm$ 0.03    | 0.85 $\pm$ 0.05  | 0.57 $\pm$ 0.03    | 0.82 $\pm$ 0.04  | <b>2<math>\times</math>10<sup>-6</sup>*</b> | 0.48 $\pm$ 0.08 | <b>5E<sup>-11</sup>*</b>                   |
| Fasting glucose, mmol/l | 12,043 | 0.57 $\pm$ 0.04    | 0.53 $\pm$ 0.05  | 0.79 $\pm$ 0.03    | 0.87 $\pm$ 0.03  | 0.42                                        | 0.78 $\pm$ 0.14 | 0.07                                       |
| 2 h glucose, mmol/l     | 11,360 | 0.55 $\pm$ 0.04    | 0.55 $\pm$ 0.05  | 0.78 $\pm$ 0.03    | 0.89 $\pm$ 0.03  | 0.94                                        | 0.77 $\pm$ 0.15 | 0.08                                       |

Significant estimates are marked in bold. \* Withstand the Bonferroni corrected  $p$ -value of 0.00019.

TC, total cholesterol; TG, triacylglycerol.

$\sigma_G$ : Genetic standard deviation;  $\sigma_E$ : Environmental standard deviation;  $\sigma$   $p$ -value:  $p$ -value of the variance homogeneity null hypothesis;  $\rho_G$ : genetic correlation;  $\rho_G$   $p$ -value:  $p$ -value of the genetic correlation equal to 1 null hypothesis.

d) Variance components parameters estimates ( $\pm$ s.e.) for genotype-physical activity interactions on glycaemic and lipid traits

| Phenotypes              | $N$    | $\sigma_G$ Active | $\sigma_G$ Inactive | $\sigma_E$ Active | $\sigma_E$ Inactive | $\sigma$ $p$ -value                        | $\rho_G$        | $\rho_G$ $p$ -value                        |
|-------------------------|--------|-------------------|---------------------|-------------------|---------------------|--------------------------------------------|-----------------|--------------------------------------------|
| TC, mmol/l              | 11,434 | 0.69 $\pm$ 0.05   | 0.64 $\pm$ 0.03     | 0.71 $\pm$ 0.05   | 0.77 $\pm$ 0.02     | 0.37                                       | 1               | -                                          |
| HDL-C, mmol/l           | 2,166  | 0.58 $\pm$ 0.23   | 0.62 $\pm$ 0.14     | 0.80 $\pm$ 0.16   | 0.78 $\pm$ 0.11     | 0.9                                        | 1               | -                                          |
| LDL-C, mmol/l           | 2,144  | 0.72 $\pm$ 0.22   | 0.58 $\pm$ 0.13     | 0.65 $\pm$ 0.24   | 0.83 $\pm$ 0.09     | 0.61                                       | 1               | -                                          |
| TG, mmol/l              | 9,967  | 0.61 $\pm$ 0.06   | 0.63 $\pm$ 0.03     | 0.61 $\pm$ 0.05   | 0.83 $\pm$ 0.03     | 0.73                                       | 0.77 $\pm$ 0.11 | <b>3<math>\times</math>10<sup>-2</sup></b> |
| Fasting glucose, mmol/l | 11,434 | 0.56 $\pm$ 0.08   | 0.52 $\pm$ 0.03     | 0.82 $\pm$ 0.05   | 0.86 $\pm$ 0.02     | 0.6                                        | 0.93 $\pm$ 0.18 | 0.35                                       |
| 2 h glucose, mmol/l     | 10,810 | 0.37 $\pm$ 0.07   | 0.57 $\pm$ 0.04     | 0.87 $\pm$ 0.03   | 0.85 $\pm$ 0.02     | <b>1<math>\times</math>10<sup>-2</sup></b> | 1               | -                                          |

Significant estimates are marked in bold. None of the results withstand the Bonferroni corrected  $p$ -value of 0.00019.

TC, total cholesterol; TG, triacylglycerol. Physical activity variable was categorized on two categories (inactive and active).

$\sigma_G$ : Genetic standard deviation;  $\sigma_E$ : Environmental standard deviation;  $\sigma$   $p$ -value:  $p$ -value of the variance homogeneity null hypothesis;  $\rho_G$ : genetic correlation;  $\rho_G$   $p$ -value:  $p$ -value of the genetic correlation equal to 1 null hypothesis.

e) Variance components parameters estimates ( $\pm$ s.e.) for genotype-smoking status interactions on glycaemic and lipid traits

| Phenotypes              | $N$   | $\sigma_G$ Non-smokers | $\sigma_G$ Smokers | $\sigma_E$ Non-smokers | $\sigma_E$ Smokers | $\sigma$ $p$ -value | $\rho_G$         | $\rho_G$ $p$ -value |
|-------------------------|-------|------------------------|--------------------|------------------------|--------------------|---------------------|------------------|---------------------|
| TC, mmol/l              | 7,941 | 0.65 $\pm$ 0.04        | 0.66 $\pm$ 0.06    | 0.73 $\pm$ 0.03        | 0.79 $\pm$ 0.05    | 0.98                | 1                | -                   |
| HDL-C, mmol/l           | 1,456 | 0.65 $\pm$ 0.18        | 0.98 $\pm$ 0.03    | 0.76 $\pm$ 0.15        | 0                  | 0.21                | -0.13 $\pm$ 0.56 | 0.07                |
| LDL-C, mmol/l           | 1,444 | 0.69 $\pm$ 0.17        | 0.53 $\pm$ 0.27    | 0.68 $\pm$ 0.17        | 0.90 $\pm$ 0.16    | 0.59                | 1                | -                   |
| TG, mmol/l              | 6,955 | 0.60 $\pm$ 0.04        | 0.60 $\pm$ 0.08    | 0.71 $\pm$ 0.03        | 0.94 $\pm$ 0.05    | 0.97                | 1                | -                   |
| Fasting glucose, mmol/l | 8,018 | 0.61 $\pm$ 0.04        | 0.43 $\pm$ 0.10    | 0.79 $\pm$ 0.03        | 0.90 $\pm$ 0.05    | 0.08                | 0.97 $\pm$ 0.33  | 0.46                |
| 2 h glucose, mmol/l     | 7,559 | 0.52 $\pm$ 0.05        | 0.53 $\pm$ 0.08    | 0.83 $\pm$ 0.03        | 0.88 $\pm$ 0.05    | 0.95                | 1                | -                   |

TC, total cholesterol; TG, triacylglycerol. Smoking status variable was categorized in two categories (smokers and non-smokers).

$\sigma_G$ : Genetic standard deviation;  $\sigma_E$ : Environmental standard deviation;  $\sigma$   $p$ -value:  $p$ -value of the variance homogeneity null hypothesis;  $\rho_G$ : genetic correlation;  $\rho_G$   $p$ -value:  $p$ -value of the genetic correlation equal to 1 null hypothesis.

f) Variance components parameters estimates for genotype-alcohol intake interactions on glycaemic and lipid traits

| Phenotypes              | $N$    | $\alpha_G$ | $\gamma_G$ | $\lambda$ | $\alpha_E$ | $\gamma_E$ | $\gamma_G$ $p$ -value                | $\lambda$ $p$ -value |
|-------------------------|--------|------------|------------|-----------|------------|------------|--------------------------------------|----------------------|
| TC, mmol/l              | 10,650 | -0.8058    | -0.0738    | 0.0275    | -0.6031    | 0.0207     | 0.5                                  | 0.26                 |
| HDL-C, mmol/l           | 2,038  | -0.5625    | 0.0686     | 0.143     | -0.8898    | -0.0779    | 0.29                                 | 0.19                 |
| LDL-C, mmol/l           | 2,018  | -0.8182    | -0.0147    | 0         | -0.5945    | -0.0165    | 0.83                                 | 0.5                  |
| TG, mmol/l              | 9,432  | -0.8951    | 0.0289     | 0.0727    | -0.5379    | 0.0396     | 0.44                                 | 0.1                  |
| Fasting glucose, mmol/l | 10,649 | -1.3892    | -0.1557    | 0         | -0.3059    | 0.0257     | 0.22                                 | 0.5                  |
| 2 h glucose, mmol/l     | 10,072 | -1.5676    | -0.313     | 0         | -0.2822    | 0.0582     | <b><math>4 \times 10^{-3}</math></b> | 0.5                  |

Significant estimates are marked in bold. None of the results withstand the Bonferroni corrected  $p$ -value of 0.00019.

TC, total cholesterol; TG, triacylglycerol.

$\alpha_G$ ,  $\gamma_G$ ,  $\lambda$ ,  $\alpha_E$  and  $\gamma_E$  are parameters estimated in the genotype-environment interaction model for continuous environmental exposures (see Eq. 4 and 5).  $\gamma_G$   $p$ -value:  $p$ -value of the variance homogeneity null hypothesis;  $\lambda$   $p$ -value:  $p$ -value of the genetic correlation equal to 1 null hypothesis.

g) Variance components parameters estimates for genotype-diet pattern interactions on glycaemic and lipid traits

| Phenotypes              | $N$    | $\alpha_G$ | $\gamma_G$ | $\lambda$ | $\alpha_E$ | $\gamma_E$ | $\gamma_G$ $p$ -value | $\lambda$ $p$ -value                 |
|-------------------------|--------|------------|------------|-----------|------------|------------|-----------------------|--------------------------------------|
| TC, mmol/l              | 10,650 | -0.834     | -0.032     | 0         | -0.574     | -0.0033    | 0.45                  | 0.5                                  |
| HDL-C, mmol/l           | 2,038  | -0.7844    | 0.0204     | 0         | -0.6247    | -0.0348    | 0.81                  | 0.5                                  |
| LDL-C, mmol/l           | 2,018  | -0.9097    | -0.1352    | 0         | -0.5644    | 0.0554     | 0.29                  | 0.5                                  |
| TG, mmol/l              | 9,432  | -1.0102    | 0.0822     | 0         | -0.4796    | 0.063      | 0.17                  | 0.5                                  |
| Fasting glucose, mmol/l | 10,649 | -1.0001    | -0.0811    | 0.1635    | -0.4752    | 0.041      | 0.17                  | <b><math>4 \times 10^{-3}</math></b> |
| 2 h glucose, mmol/l     | 10,072 | -1.1269    | 0.0792     | 0.1123    | -0.4013    | -0.0254    | 0.17                  | <b><math>4 \times 10^{-2}</math></b> |

Significant estimates are marked in bold. None of the results withstand the Bonferroni corrected  $p$ -value of 0.00019.

TC, total cholesterol; TG, triacylglycerol.

$\alpha_G$ ,  $\gamma_G$ ,  $\lambda$ ,  $\alpha_E$  and  $\gamma_E$  are parameters estimated in the genotype-environment interaction model for continuous environmental exposures (see Eq. 4 and 5).  $\gamma_G$   $p$ -value:  $p$ -value of the variance homogeneity null hypothesis;  $\lambda$   $p$ -value:  $p$ -value of the genetic correlation equal to 1 null hypothesis.



h) Variance components parameters estimates for genotype-carbohydrate intake interactions on glycaemic and lipid traits

| Phenotypes              | $N$    | $\alpha_G$ | $\gamma_G$ | $\lambda$ | $\alpha_E$ | $\gamma_E$ | $\gamma_G$ $p$ -value | $\lambda$ $p$ -value                 |
|-------------------------|--------|------------|------------|-----------|------------|------------|-----------------------|--------------------------------------|
| TC, mmol/l              | 10,650 | -0.8374    | 0.0156     | 0         | -0.5734    | 0.0003     | 0.18                  | 0.5                                  |
| HDL-C, mmol/l           | 2,038  | -0.7388    | -0.0043    | 0         | -0.663     | 0.0075     | 0.86                  | 0.5                                  |
| LDL-C, mmol/l           | 2,018  | -0.9024    | 0.0518     | 0         | -0.5877    | -0.0222    | 0.09                  | 0.5                                  |
| TG, mmol/l              | 9,432  | -1.0112    | -0.021     | 0         | -0.4784    | -0.0236    | 0.29                  | 0.5                                  |
| Fasting glucose, mmol/l | 10,649 | -1.0409    | 0.0131     | 0.0469    | -0.4448    | -0.0118    | 0.59                  | <b><math>1 \times 10^{-2}</math></b> |
| 2 h glucose, mmol/l     | 10,072 | -1.2073    | -0.0225    | 0.0251    | -0.3617    | 0.0043     | 0.41                  | 0.1                                  |

Significant estimates are marked in bold. None of the results withstand the Bonferroni corrected  $p$ -value of 0.00019.

TC, total cholesterol; TG, triacylglycerol.

$\alpha_G$ ,  $\gamma_G$ ,  $\lambda$ ,  $\alpha_E$  and  $\gamma_E$  are parameters estimated in the genotype-environment interaction model for continuous environmental exposures (see Eq. 4 and 5).  $\gamma_G$   $p$ -value:  $p$ -value of the variance homogeneity null hypothesis;  $\lambda$   $p$ -value:  $p$ -value of the genetic correlation equal to 1 null hypothesis.

i) Variance components parameters estimates for genotype-protein intake interactions on glycaemic and lipid traits

| Phenotypes              | $N$    | $\alpha_G$ | $\gamma_G$ | $\lambda$ | $\alpha_E$ | $\gamma_E$ | $\gamma_G$ $p$ -value                | $\lambda$ $p$ -value                 |
|-------------------------|--------|------------|------------|-----------|------------|------------|--------------------------------------|--------------------------------------|
| TC, mmol/l              | 10,650 | -0.7785    | -0.053     | 0.0279    | -0.6249    | 0.0299     | 0.25                                 | 0.19                                 |
| HDL-C, mmol/l           | 2,038  | -0.0779    | -0.004     | 0.3458    | -2.6808    | -0.0478    | 0.9                                  | <b><math>1 \times 10^{-2}</math></b> |
| LDL-C, mmol/l           | 2,018  | -0.3889    | 0.0271     | 0.2744    | -1.1926    | -0.1129    | 0.54                                 | 0.18                                 |
| TG, mmol/l              | 9,432  | -1.0005    | 0.1421     | 0         | -0.497     | -0.007     | <b><math>2 \times 10^{-2}</math></b> | 0.5                                  |
| Fasting glucose, mmol/l | 10,649 | -1.2692    | 0.12       | 0.0292    | -0.349     | -0.0062    | 0.18                                 | 0.29                                 |
| 2 h glucose, mmol/l     | 10,072 | -1.2752    | -0.1338    | 0.0628    | -0.3528    | 0.0572     | 0.05                                 | 0.15                                 |

Significant estimates are marked in bold. None of the results withstand the Bonferroni corrected  $p$ -value of 0.00019.

TC, total cholesterol; TG, triacylglycerol.

$\alpha_G$ ,  $\gamma_G$ ,  $\lambda$ ,  $\alpha_E$  and  $\gamma_E$  are parameters estimated in the genotype-environment interaction model for continuous environmental exposures (see Eq. 4 and 5).  $\gamma_G$   $p$ -value:  $p$ -value of the variance homogeneity null hypothesis;  $\lambda$   $p$ -value:  $p$ -value of the genetic correlation equal to 1 null hypothesis.

j) Variance components parameters estimates for genotype-fibre intake interactions on glycaemic and lipid traits

| Phenotypes              | $N$    | $\alpha_G$ | $\gamma_G$ | $\lambda$ | $\alpha_E$ | $\gamma_E$ | $\gamma_G$ $p$ -value | $\lambda$ $p$ -value |
|-------------------------|--------|------------|------------|-----------|------------|------------|-----------------------|----------------------|
| TC, mmol/l              | 10,650 | -0.7714    | -0.0117    | 0.0816    | -0.6252    | 0.1016     | 0.94                  | 0.25                 |
| HDL-C, mmol/l           | 2,038  | -0.4597    | 0.0755     | 0.6086    | -1.0178    | 0.0388     | 0.67                  | 0.2                  |
| LDL-C, mmol/l           | 2,018  | -0.8051    | -0.0656    | 0         | -0.6095    | 0.1483     | 0.86                  | 0.5                  |
| TG, mmol/l              | 9,432  | -0.9578    | 0.1013     | 0.1037    | -0.5247    | -0.3979    | 0.4                   | 0.2                  |
| Fasting glucose, mmol/l | 10,649 | -1.2939    | 0.2016     | 0.0585    | -0.3332    | 0.1018     | 0.34                  | 0.36                 |
| 2 h glucose, mmol/l     | 10,072 | -1.2271    | -0.3054    | 0.2491    | -0.3585    | 0.116      | 0.28                  | 0.18                 |

TC, total cholesterol; TG, triacylglycerol.

$\alpha_G$ ,  $\gamma_G$ ,  $\lambda$ ,  $\alpha_E$  and  $\gamma_E$  are parameters estimated in the genotype-environment interaction model for continuous environmental exposures (see Eq. 4 and 5).  $\gamma_G$   $p$ -value:  $p$ -value of the variance homogeneity null hypothesis;  $\lambda$   $p$ -value:  $p$ -value of the genetic correlation equal to 1 null hypothesis.

k) Variance components parameters estimates for genotype-total fat intake interactions on glycaemic and lipid traits

| Phenotypes              | $N$    | $\alpha_G$ | $\gamma_G$ | $\lambda$ | $\alpha_E$ | $\gamma_E$ | $\gamma_G$ $p$ -value | $\lambda$ $p$ -value                 |
|-------------------------|--------|------------|------------|-----------|------------|------------|-----------------------|--------------------------------------|
| TC, mmol/l              | 10,650 | -0.8324    | -0.0079    | 0         | -0.5745    | -0.001     | 0.51                  | 0.5                                  |
| HDL-C, mmol/l           | 2,038  | -0.7808    | 0.003      | 0         | -0.628     | -0.014     | 0.91                  | 0.5                                  |
| LDL-C, mmol/l           | 2,018  | -0.8695    | -0.0358    | 0         | -0.5791    | 0.0145     | 0.51                  | 0.5                                  |
| TG, mmol/l              | 9,432  | -1.0032    | 0.022      | 0         | -0.4785    | 0.0205     | 0.1                   | 0.5                                  |
| Fasting glucose, mmol/l | 10,649 | -1.0195    | -0.0244    | 0.0507    | -0.4636    | 0.0166     | 0.27                  | <b><math>5 \times 10^{-3}</math></b> |
| 2 h glucose, mmol/l     | 10,072 | -1.1278    | 0.0285     | 0.0383    | -0.4013    | -0.0062    | 0.1                   | <b><math>3 \times 10^{-2}</math></b> |

Significant estimates are marked in bold. None of the results withstand the Bonferroni corrected  $p$ -value of 0.00019.

TC, total cholesterol; TG, triacylglycerol.

$\alpha_G$ ,  $\gamma_G$ ,  $\lambda$ ,  $\alpha_E$  and  $\gamma_E$  are parameters estimated in the genotype-environment interaction model for continuous environmental exposures (see Eq. 4 and 5).  $\gamma_G$   $p$ -value:  $p$ -value of the variance homogeneity null hypothesis;  $\lambda$   $p$ -value:  $p$ -value of the genetic correlation equal to 1 null hypothesis.

l) Variance components parameters estimates for genotype-saturated fat intake interactions on glycaemic and lipid traits

| Phenotypes              | $N$    | $\alpha_G$ | $\gamma_G$ | $\lambda$ | $\alpha_E$ | $\gamma_E$ | $\gamma_G$ $p$ -value                | $\lambda$ $p$ -value                 |
|-------------------------|--------|------------|------------|-----------|------------|------------|--------------------------------------|--------------------------------------|
| TC, mmol/l              | 10,650 | -0.8265    | 0.0055     | 0         | -0.5792    | -0.0131    | 0.83                                 | 0.5                                  |
| HDL-C, mmol/l           | 2,038  | -0.7699    | -0.0044    | 0         | -0.6351    | -0.0167    | 0.92                                 | 0.5                                  |
| LDL-C, mmol/l           | 2,018  | -0.8296    | -0.036     | 0         | -0.5905    | -0.0009    | 0.72                                 | 0.5                                  |
| TG, mmol/l              | 9,432  | -0.9766    | 0.0061     | 0.0009    | -0.4792    | 0.0087     | 0.77                                 | 0.49                                 |
| Fasting glucose, mmol/l | 10,649 | -1.042     | 0.0605     | 0.0889    | -0.4599    | -0.0388    | <b><math>4 \times 10^{-2}</math></b> | <b><math>9 \times 10^{-3}</math></b> |
| 2 h glucose, mmol/l     | 10,072 | -1.2132    | 0.0448     | 0.0454    | -0.3607    | -0.0148    | 0.15                                 | 0.1                                  |

Significant estimates are marked in bold. None of the results withstand the Bonferroni corrected  $p$ -value of 0.00019.

TC, total cholesterol; TG, triacylglycerol.

$\alpha_G$ ,  $\gamma_G$ ,  $\lambda$ ,  $\alpha_E$  and  $\gamma_E$  are parameters estimated in the genotype-environment interaction model for continuous environmental exposures (see Eq. 4 and 5).  $\gamma_G$   $p$ -value:  $p$ -value of the variance homogeneity null hypothesis;  $\lambda$   $p$ -value:  $p$ -value of the genetic correlation equal to 1 null hypothesis.

m) Variance components parameters estimates for genotype-essential fatty acids intake interactions on glycaemic and lipid traits

| Phenotypes              | $N$    | $\alpha_G$ | $\gamma_G$ | $\lambda$ | $\alpha_E$ | $\gamma_E$ | $\gamma_G$ $p$ -value                | $\lambda$ $p$ -value                 |
|-------------------------|--------|------------|------------|-----------|------------|------------|--------------------------------------|--------------------------------------|
| TC, mmol/l              | 10,650 | -0.8404    | -0.0922    | 0         | -0.5756    | 0.0323     | 0.19                                 | 0.5                                  |
| HDL-C, mmol/l           | 2,038  | -0.8114    | 0.0045     | 0         | -0.5993    | 0.0089     | 0.96                                 | 0.5                                  |
| LDL-C, mmol/l           | 2,018  | -0.1718    | -0.0154    | 0.9188    | -1.8899    | 0.0025     | 0.67                                 | 0.24                                 |
| TG, mmol/l              | 9,432  | -1.012     | 0.1054     | 0         | -0.4749    | 0.0619     | <b><math>2 \times 10^{-2}</math></b> | 0.5                                  |
| Fasting glucose, mmol/l | 10,649 | -1.101     | -0.0984    | 0.1827    | -0.416     | 0.0423     | 0.18                                 | <b><math>4 \times 10^{-2}</math></b> |
| 2 h glucose, mmol/l     | 10,072 | -1.3765    | 0.0558     | 0         | -0.2944    | -0.0117    | 0.55                                 | 0.5                                  |

Significant estimates are marked in bold. None of the results withstand the Bonferroni corrected  $p$ -value of 0.00019.

TC, total cholesterol; TG, triacylglycerol.

$\alpha_G$ ,  $\gamma_G$ ,  $\lambda$ ,  $\alpha_E$  and  $\gamma_E$  are parameters estimated in the genotype-environment interaction model for continuous environmental exposures (see Eq. 4 and 5).  $\gamma_G$   $p$ -value:  $p$ -value of the variance homogeneity null hypothesis;  $\lambda$   $p$ -value:  $p$ -value of the genetic correlation equal to 1 null hypothesis.

n) Variance components parameters estimates for genotype-polyunsaturated fat intake interactions on glycaemic and lipid traits

| Phenotypes              | $N$    | $\alpha_G$ | $\gamma_G$ | $\lambda$ | $\alpha_E$ | $\gamma_E$ | $\gamma_G$ $p$ -value                | $\lambda$ $p$ -value                 |
|-------------------------|--------|------------|------------|-----------|------------|------------|--------------------------------------|--------------------------------------|
| TC, mmol/l              | 10,650 | -0.838     | -0.0751    | 0         | -0.5753    | 0.0311     | 0.27                                 | 0.5                                  |
| HDL-C, mmol/l           | 2,038  | -0.8149    | 0.0193     | 0         | -0.5972    | -0.001     | 0.84                                 | 0.5                                  |
| LDL-C, mmol/l           | 2,018  | -0.438     | -0.0337    | 0.3454    | -1.0587    | 0.0381     | 0.64                                 | 0.35                                 |
| TG, mmol/l              | 9,432  | -1.0173    | 0.1161     | 0         | -0.4731    | 0.0527     | <b><math>2 \times 10^{-2}</math></b> | 0.5                                  |
| Fasting glucose, mmol/l | 10,649 | -1.0258    | -0.0793    | 0.2299    | -0.4552    | 0.0461     | 0.19                                 | <b><math>1 \times 10^{-2}</math></b> |
| 2 h glucose, mmol/l     | 10,072 | -1.3859    | 0.0737     | 0         | -0.2926    | -0.0154    | 0.38                                 | 0.5                                  |

Significant estimates are marked in bold. None of the results withstand the Bonferroni corrected  $p$ -value of 0.00019.

TC, total cholesterol; TG, triacylglycerol.

$\alpha_G$ ,  $\gamma_G$ ,  $\lambda$ ,  $\alpha_E$  and  $\gamma_E$  are parameters estimated in the genotype-environment interaction model for continuous environmental exposures (see Eq. 4 and 5).  $\gamma_G$   $p$ -value:  $p$ -value of the variance homogeneity null hypothesis;  $\lambda$   $p$ -value:  $p$ -value of the genetic correlation equal to 1 null hypothesis.

o) Variance components parameters estimates for genotype-monounsaturated fat intake interactions on glycaemic and lipid traits

| Phenotypes              | $N$    | $\alpha_G$ | $\gamma_G$ | $\lambda$ | $\alpha_E$ | $\gamma_E$ | $\gamma_G$ $p$ -value | $\lambda$ $p$ -value                 |
|-------------------------|--------|------------|------------|-----------|------------|------------|-----------------------|--------------------------------------|
| TC, mmol/l              | 10,650 | -0.8353    | -0.0323    | 0         | -0.5734    | 0.0019     | 0.31                  | 0.5                                  |
| HDL-C, mmol/l           | 2,038  | -0.8074    | 0.0377     | 0         | -0.6094    | -0.0351    | 0.63                  | 0.5                                  |
| LDL-C, mmol/l           | 2,018  | -0.4531    | -0.067     | 0.1656    | -1.0576    | 0.0587     | 1                     | 0.17                                 |
| TG, mmol/l              | 9,432  | -1.0125    | 0.089      | 0         | -0.477     | 0.042      | 0.22                  | 0.5                                  |
| Fasting glucose, mmol/l | 10,649 | -1.0964    | -0.0704    | 0.1       | -0.4196    | 0.0304     | 0.22                  | <b><math>3 \times 10^{-2}</math></b> |
| 2 h glucose, mmol/l     | 10,072 | -0.9906    | 0.0577     | 0.1652    | -0.4737    | -0.0323    | 0.19                  | <b><math>3 \times 10^{-3}</math></b> |

Significant estimates are marked in bold. None of the results withstand the Bonferroni corrected  $p$ -value of 0.00019.

TC, total cholesterol; TG: triacylglycerol.

$\alpha_G$ ,  $\gamma_G$ ,  $\lambda$ ,  $\alpha_E$  and  $\gamma_E$  are parameters estimated in the genotype-environment interaction model for continuous environmental exposures (see Eq. 4 and 5).  $\gamma_G$   $p$ -value:  $p$ -value of the variance homogeneity null hypothesis;  $\lambda$   $p$ -value:  $p$ -value of the genetic correlation equal to 1 null hypothesis.



## ELECTRONIC SUPPLEMENTARY FIGURES

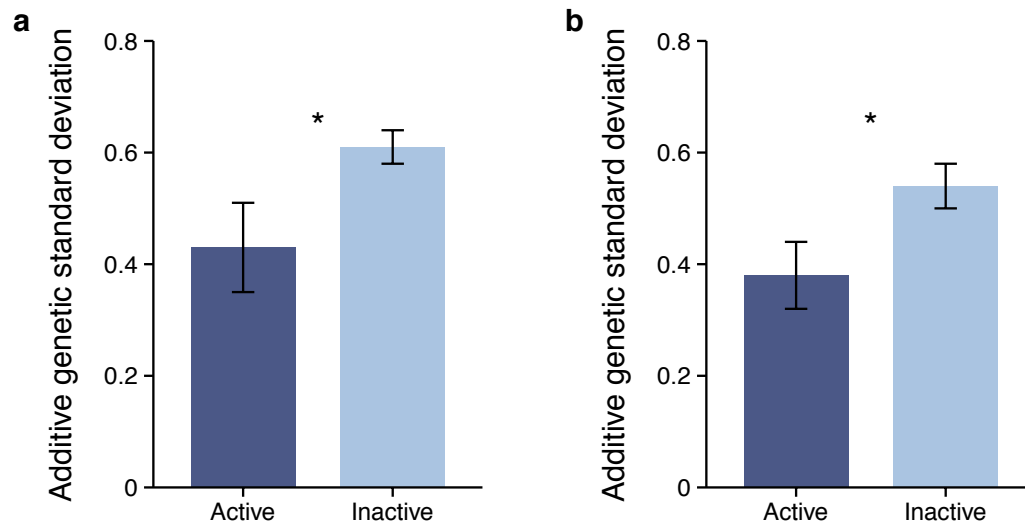

**ESM Figure 1. *Class 1* genotype-physical activity interactions for a) DBP and b) 2 h glucose**

Only significant traits are represented in the figure; \* $p < 0.05$ , \*\* $p < 0.01$ , \*\*\* $p < 0.001$ .

All interactions were nominally significant ( $p < 0.05$ ).

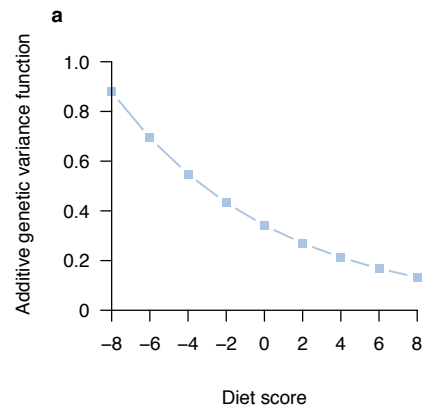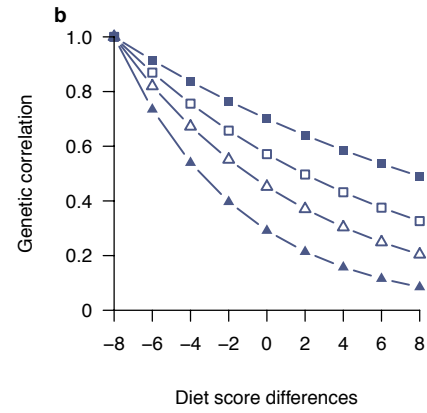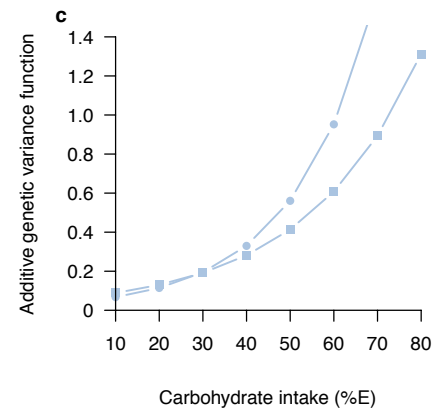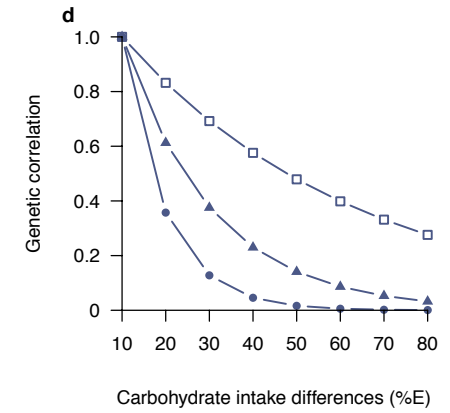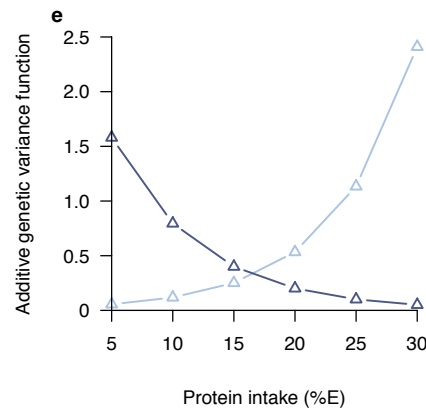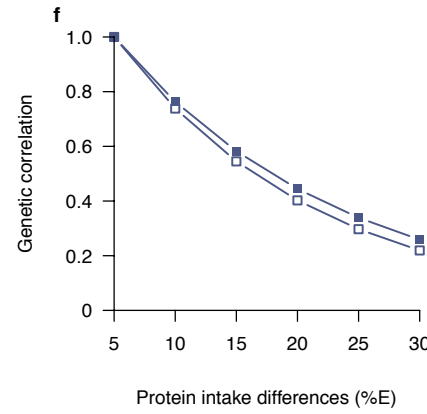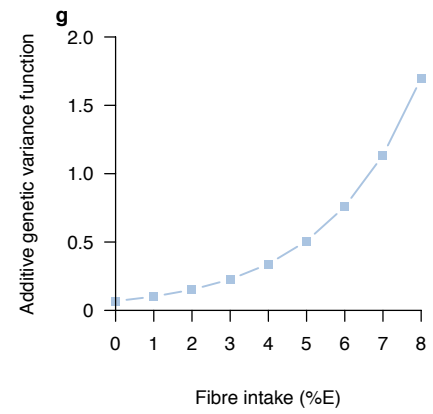

**ESM Figure 2. Genotype-diet components interactions**

a) *class 1* genotype-diet score interactions, b) *class 2* genotype-diet score interactions, c) *class 1* genotype-carbohydrate intake interactions, d) *class 2* genotype-carbohydrate intake interactions, e) *class 1* genotype-protein intake interactions, f) *class 2* genotype-protein intake interactions, g) *class 1* genotype-fibre intake interactions.

Dark blue full square, weight; dark blue empty square, BMI; dark blue full circle, waist circumference; dark blue full triangle, fasting glucose; dark blue empty triangle, 2 h glucose; light blue full square, SBP; light blue empty triangle, triacylglycerol; light blue full circle, LDL-C.

Only significant traits are represented in the Figure. All interactions were nominally significant ( $p < 0.05$ ).

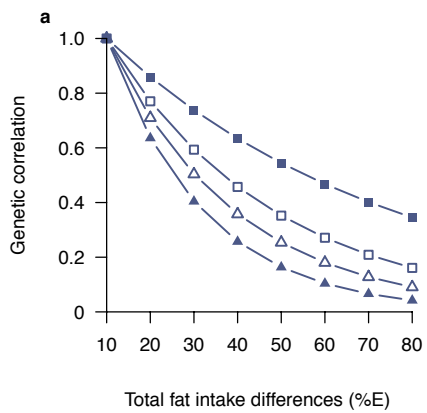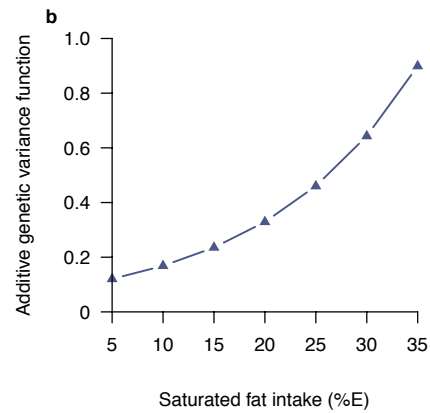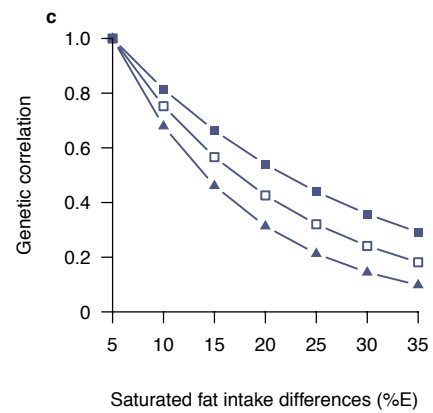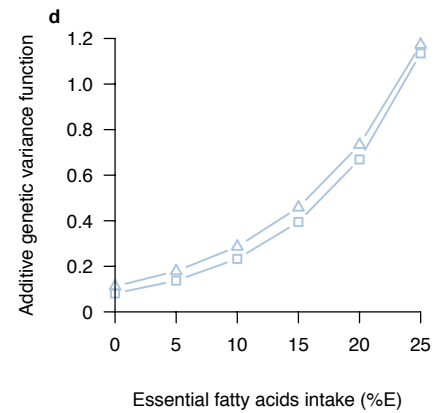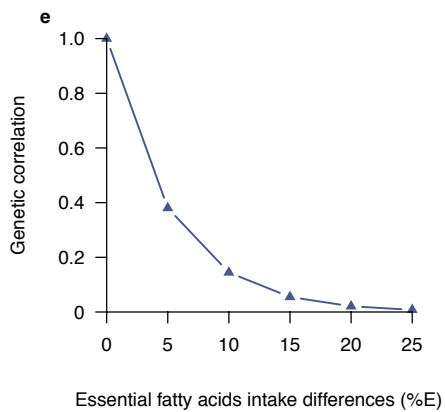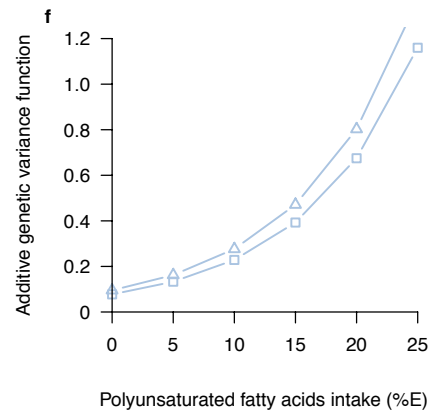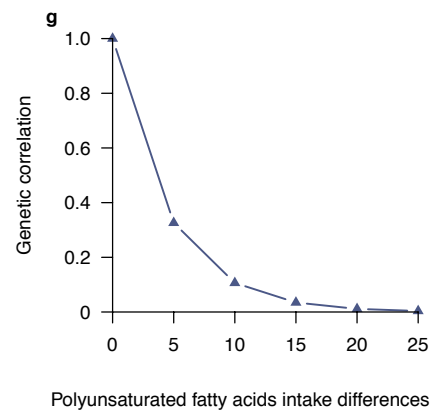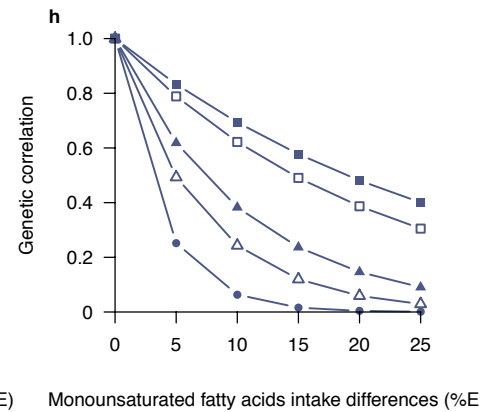

### ESM Figure 3. Genotype-fat intake interactions

a) *class 2* genotype-total fat intake interactions, b) *class 1* genotype-saturated fat intake interactions, c) *class 2* genotype-saturated fat intake interactions, d) *class 1* genotype-essential fatty acid intake interactions, e) *class 2* genotype-essential fatty acid intake interactions, f) *class 1* genotype-polyunsaturated fatty acids intake interactions, g) *class 2* genotype-polyunsaturated fatty acids intake interactions, e) *class 2* genotype-monounsaturated fatty acids intake interactions.

Dark blue full square, weight; dark blue empty square, BMI; dark blue full circle, waist circumference; dark blue full triangle, fasting glucose; dark blue empty triangle, 2 h glucose; light blue empty square, DBP; light blue empty triangle, triacylglycerol.

Only significant traits are represented in the Figure. All interactions were nominally significant ( $p < 0.05$ ).
